# Supplementary material
Source: ML conference proceedings conference paper supplement (https://openreview.net/forum?id=ZK7dqwWxex)
Supplement: supplementary_material [file Technical Appendices and Supplementary Material.pdf › Supplementary Material/Technical Appendices and Supplementary Material.pdf]

## Technical Appendices and Supplementary Material

### Contents

|          |                                                |          |
|----------|------------------------------------------------|----------|
| <b>1</b> | <b>Details of subset of MATH training data</b> | <b>2</b> |
| <b>2</b> | <b>Examples of Concept Dependency Graph</b>    | <b>2</b> |
| <b>3</b> | <b>Zero-shot Small Model Performance</b>       | <b>2</b> |
| <b>4</b> | <b>Tag Clustering Details</b>                  | <b>3</b> |
| <b>5</b> | <b>Examples of Decomposed Data</b>             | <b>7</b> |

## 1 Details of subset of MATH training data

In Table 1, we present the original and sampled sizes of the MATH dataset used in our experiments, broken down by subject domain and difficulty level. Sampling was performed uniformly at random within each group to ensure representative coverage of the various topics and levels.

Table 1. **Statistics of the original and sampled MATH dataset by subject domain (left) and by difficulty level (right).** Samples were drawn uniformly at random within each group to ensure representative coverage across topics and difficulty tiers.

| By Domain                |        |          | By Difficulty Level |        |          |
|--------------------------|--------|----------|---------------------|--------|----------|
| Domain                   | #Total | #Sampled | Level               | #Total | #Sampled |
| Algebra                  | 1744   | 84       | Level 1             | 566    | 26       |
| Counting and Probability | 771    | 36       | Level 2             | 1348   | 65       |
| Geometry                 | 870    | 43       | Level 3             | 1592   | 77       |
| Intermediate Algebra     | 1295   | 63       | Level 4             | 1690   | 81       |
| Number Theory            | 869    | 41       | Level 5             | 2304   | 111      |
| Prealgebra               | 1205   | 58       |                     |        |          |
| Precalculus              | 746    | 35       |                     |        |          |
| #Sampled / #Total        |        |          | 300 / 7500          |        |          |

## 2 Examples of Concept Dependency Graph

Figure 1 presents the concept dependency graphs constructed during the data decomposition process. We observe that an atomic mathematical operation, such as *Addition*, has many edges linking it to more advanced operations.

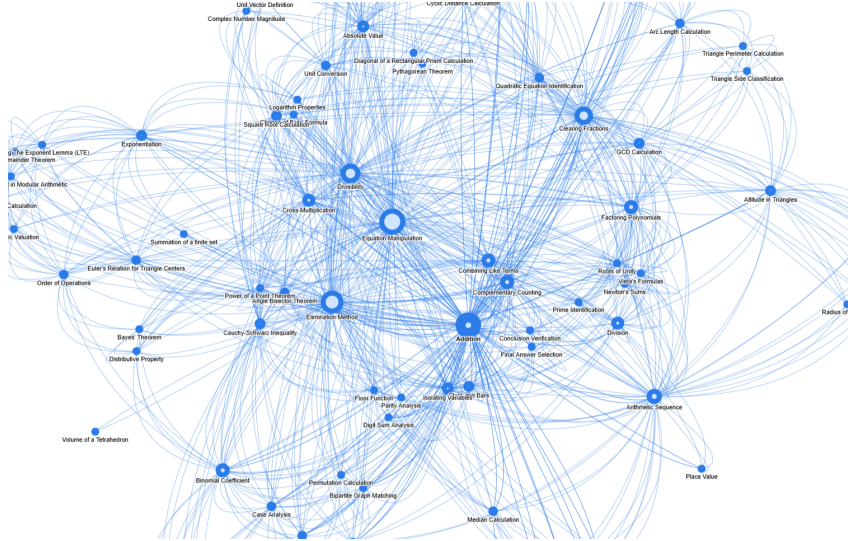

Figure 1. **Concept dependency graph constructed during the AIME data decomposition process.** Nodes represent mathematical concepts, and edges indicate prerequisite relationships between concepts.

## 3 Zero-shot Small Model Performance

We partitioned the decomposed AIME2024 dataset into five equal-sized bins (quintiles) based on our proposed difficulty measurement, shown in Table 2. This measurement is derived from the concept

dependency graph, designed to reflect the conceptual complexity of each problem. We then evaluated the zero-shot performance of the Qwen3-4B-Base model on each difficulty tier.

Our results shown in Figure 2 demonstrate a clear inverse correlation between difficulty score and model accuracy: the model achieves the highest accuracy on problems with the lowest difficulty scores (Quintile 1), and its performance degrades as the difficulty increases, reaching the lowest accuracy on the highest difficulty tier (Quintile 5). This performance trend validates the effectiveness of our concept dependency graph-based difficulty metric in capturing the relative hardness of mathematical problems.

Table 2. **Definition of difficulty quintiles based on concept dependency graph scores.** Each quintile groups problems whose scores fall within the specified range.

| Quintile             | Difficulty Score Range |
|----------------------|------------------------|
| Quintile 1 (Easiest) | 2.0 – 4.0              |
| Quintile 2           | 4.0 – 4.0              |
| Quintile 3           | 4.0 – 6.0              |
| Quintile 4           | 6.0 – 10.0             |
| Quintile 5 (Hardest) | 10.0 – 20.0            |

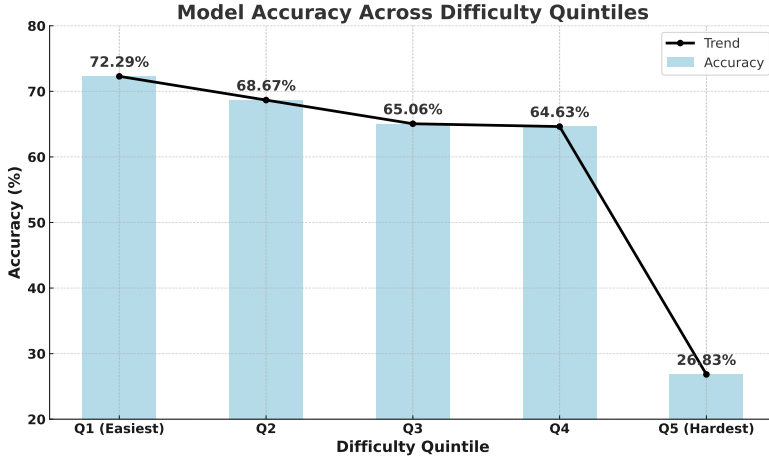

Figure 2. **Zero-shot performance of the Qwen3-4B-Base model across difficulty quintiles.** Accuracy decreases as problem difficulty increases, validating our proposed difficulty metric.

#### 4 Tag Clustering Details

We summarize the tag information identified in both the MATH dataset (Table 3) and the AIME dataset (Tables 4 and 5).

Table 3. **Summary of Cluster Tags.** Sample count represents the number of mathematical problems associated with each cluster tag. Keywords are derived from the tags within each cluster.

| Domain                                      | #questions | Keywords                                                                                                                                                                                                                                                                                                                                                                                                                                                                    |
|---------------------------------------------|------------|-----------------------------------------------------------------------------------------------------------------------------------------------------------------------------------------------------------------------------------------------------------------------------------------------------------------------------------------------------------------------------------------------------------------------------------------------------------------------------|
| Equation Manipulation                       | 17         | Equation Manipulation, Equation Simplification, Equation Solving, Equation Subtraction, Linear Equation, Linear Equation in Two Variables, Linear Equations, Polynomial Equation Solving, Polynomial Simplification, Quadratic Equation, Rational Equation, Rational Equation Solving, Rearranging Equations, Simplifying Expressions, Simultaneous Equations, Simultaneous Equations Solving, Solving Rational Equations, Substitution, Subtraction, Variable substitution |
| Elimination Method                          | 14         | Elimination Method, Equation Solving: Isolating Variables, Linear Equation Solving, Solving Linear Equations, Substitution Method                                                                                                                                                                                                                                                                                                                                           |
| Addition                                    | 12         | Addition, Addition of Integers, Arithmetic Addition, Arithmetic Operations, Column Addition, Digit Sum, Fraction Addition, Integer Addition, Multiplication, Place Value Addition, Summation                                                                                                                                                                                                                                                                                |
| Divisibility                                | 11         | Divisibility, Divisibility Rules, Division Property of Equality, Polynomial Division                                                                                                                                                                                                                                                                                                                                                                                        |
| Clearing Fractions                          | 10         | Clearing Fractions, Common Denominator Calculation, Fraction Multiplication, Fraction Simplification, Fraction Subtraction, Partial Fraction Decomposition, Reciprocal Calculation, Simplifying Fractions, Subtracting Fractions with Common Denominator                                                                                                                                                                                                                    |
| Arithmetic Sequence                         | 7          | Arithmetic Sequence, Arithmetic Sequence Formula, Arithmetic Subtraction, Counting Integers in an Arithmetic Sequence, Modular Arithmetic, Sum of a Sequence, Sum of an Arithmetic Series                                                                                                                                                                                                                                                                                   |
| Factoring Polynomials                       | 6          | Factoring Polynomials, Factoring Quadratic Equations, Factoring by Grouping, Factoring by grouping, Polynomial Expansion, Prime Factorization                                                                                                                                                                                                                                                                                                                               |
| Binomial Coefficient                        | 6          | Binomial Coefficient, Binomial Coefficient Calculation, Combination Formula, Combinations Calculation, Combinatorial Counting, Sum of coefficients                                                                                                                                                                                                                                                                                                                          |
| Complementary Counting                      | 6          | Complementary Counting, Counting Principle, Counting Principles, Counting Rows, Inclusion-Exclusion Principle                                                                                                                                                                                                                                                                                                                                                               |
| Combining Like Terms                        | 6          | Combining Like Terms                                                                                                                                                                                                                                                                                                                                                                                                                                                        |
| Cross-Multiplication                        | 5          | Cross-Multiplication, Multiplication Principle, Prime Multiplication, Scalar Multiplication                                                                                                                                                                                                                                                                                                                                                                                 |
| Division                                    | 5          | Division, Division of Equations, Division of constants, Long Division                                                                                                                                                                                                                                                                                                                                                                                                       |
| Absolute Value                              | 4          | Absolute Value, Absolute Value Calculation, Absolute Value Equation, Absolute Value Equation Solving, Absolute Value Equations, Magnitude of a Complex Number, Magnitude of a Vector                                                                                                                                                                                                                                                                                        |
| Isolating Variables                         | 4          | Isolating Variables, Isolating the Variable                                                                                                                                                                                                                                                                                                                                                                                                                                 |
| GCD Calculation                             | 3          | GCD Calculation, GCD Property                                                                                                                                                                                                                                                                                                                                                                                                                                               |
| Cauchy-Schwarz Inequality                   | 3          | Cauchy-Schwarz Inequality, Compound Inequalities, Inequalities, Inequality Manipulation, Linear Inequality Simplification                                                                                                                                                                                                                                                                                                                                                   |
| Altitude in Triangles                       | 3          | Altitude in Triangles, Altitude of a Triangle, Similar Triangles, Triangle Construction                                                                                                                                                                                                                                                                                                                                                                                     |
| Stars and Bars                              | 3          | Stars and Bars, Stars and Bars Method                                                                                                                                                                                                                                                                                                                                                                                                                                       |
| Exponentiation                              | 3          | Exponentiation, Logarithm Power Rule, Modular Exponentiation                                                                                                                                                                                                                                                                                                                                                                                                                |
| Square Root Calculation                     | 3          | Square Root Calculation, Squaring a number, Squaring both sides                                                                                                                                                                                                                                                                                                                                                                                                             |
| Order of Operations                         | 2          | Order of Operations, Order of an Element                                                                                                                                                                                                                                                                                                                                                                                                                                    |
| Identifying Parallel Lines                  | 2          | Identifying Parallel Lines, Line Intersection, Parallel Lines in Polygons, Slope of Parallel and Perpendicular Lines, Slope of Perpendicular Lines                                                                                                                                                                                                                                                                                                                          |
| Perpendicular Slopes                        | 2          | Perpendicular Slopes, Slope of a Line, Vertical Tangent Line                                                                                                                                                                                                                                                                                                                                                                                                                |
| Quadratic Equation Identification           | 2          | Quadratic Equation Identification, Quadratic Formula                                                                                                                                                                                                                                                                                                                                                                                                                        |
| Combinatorial Placement                     | 2          | Combinatorial Placement                                                                                                                                                                                                                                                                                                                                                                                                                                                     |
| Solving Linear Inequalities                 | 2          | Solving Linear Inequalities, System of Linear Equations                                                                                                                                                                                                                                                                                                                                                                                                                     |
| Cyclic Distance Calculation                 | 2          | Cyclic Distance Calculation, Distance Formula                                                                                                                                                                                                                                                                                                                                                                                                                               |
| Euler's Relation for Triangle Centers       | 2          | Euler's Relation for Triangle Centers, Euler's Theorem                                                                                                                                                                                                                                                                                                                                                                                                                      |
| Arc Length Calculation                      | 2          | Arc Length Calculation, Perimeter Calculation                                                                                                                                                                                                                                                                                                                                                                                                                               |
| Angle Bisector Theorem                      | 2          | Angle Bisector Theorem, Perpendicular Bisector of a Chord                                                                                                                                                                                                                                                                                                                                                                                                                   |
| Bayes' Theorem                              | 1          | Bayes' Theorem, Conditional Probability                                                                                                                                                                                                                                                                                                                                                                                                                                     |
| Distributive Property                       | 1          | Distributive Property                                                                                                                                                                                                                                                                                                                                                                                                                                                       |
| Floor Function                              | 1          | Floor Function                                                                                                                                                                                                                                                                                                                                                                                                                                                              |
| Finding Zeros of a Function                 | 1          | Finding Zeros of a Function                                                                                                                                                                                                                                                                                                                                                                                                                                                 |
| Factorial Calculation                       | 1          | Factorial Calculation                                                                                                                                                                                                                                                                                                                                                                                                                                                       |
| Pigeonhole Principle                        | 1          | Pigeonhole Principle                                                                                                                                                                                                                                                                                                                                                                                                                                                        |
| Conclusion Verification                     | 1          | Conclusion Verification                                                                                                                                                                                                                                                                                                                                                                                                                                                     |
| Change of Base Formula                      | 1          | Change of Base Formula                                                                                                                                                                                                                                                                                                                                                                                                                                                      |
| Logarithm Properties                        | 1          | Logarithm Properties, Logarithmic Identity, Logarithmic Properties, Logarithmic Reciprocity                                                                                                                                                                                                                                                                                                                                                                                 |
| Summation of a finite set                   | 1          | Summation of a finite set                                                                                                                                                                                                                                                                                                                                                                                                                                                   |
| Complex Number Magnitude                    | 1          | Complex Number Magnitude, Complex Number Scaling, Dot Product Magnitude, Modulus of a Complex Number, Vector Magnitude Calculation                                                                                                                                                                                                                                                                                                                                          |
| Place Value                                 | 1          | Place Value                                                                                                                                                                                                                                                                                                                                                                                                                                                                 |
| Chinese Remainder Theorem                   | 1          | Chinese Remainder Theorem                                                                                                                                                                                                                                                                                                                                                                                                                                                   |
| Lifting The Exponent Lemma (LTE)            | 1          | Lifting The Exponent Lemma (LTE)                                                                                                                                                                                                                                                                                                                                                                                                                                            |
| Order of an Element in Modular Arithmetic   | 1          | Order of an Element in Modular Arithmetic, Order of an element modulo p                                                                                                                                                                                                                                                                                                                                                                                                     |
| Primitive Root Calculation                  | 1          | Primitive Root Calculation                                                                                                                                                                                                                                                                                                                                                                                                                                                  |
| $p$ -adic Valuation                         | 1          | $p$ -adic Valuation, $v_p$ ( $p$ -adic valuation)                                                                                                                                                                                                                                                                                                                                                                                                                           |
| Diagonal of a Rectangular Prism Calculation | 1          | Diagonal of a Rectangular Prism Calculation                                                                                                                                                                                                                                                                                                                                                                                                                                 |
| Pythagorean Theorem                         | 1          | Pythagorean Theorem, Pythagorean Theorem in 3D                                                                                                                                                                                                                                                                                                                                                                                                                              |
| Interior Angle of a Regular Polygon         | 1          | Interior Angle of a Regular Polygon                                                                                                                                                                                                                                                                                                                                                                                                                                         |
| Pairing Elements                            | 1          | Pairing Elements                                                                                                                                                                                                                                                                                                                                                                                                                                                            |
| Power of a Point Theorem                    | 1          | Power of a Point Theorem                                                                                                                                                                                                                                                                                                                                                                                                                                                    |
| Bipartite Graph Matching                    | 1          | Bipartite Graph Matching                                                                                                                                                                                                                                                                                                                                                                                                                                                    |
| Permutation Calculation                     | 1          | Permutation Calculation                                                                                                                                                                                                                                                                                                                                                                                                                                                     |
| Prime Identification                        | 1          | Prime Identification, Prime Number Identification, Prime Number Multiplication                                                                                                                                                                                                                                                                                                                                                                                              |
| Triangle Perimeter Calculation              | 1          | Triangle Perimeter Calculation                                                                                                                                                                                                                                                                                                                                                                                                                                              |
| Triangle Side Classification                | 1          | Triangle Side Classification                                                                                                                                                                                                                                                                                                                                                                                                                                                |
| Counterexample                              | 1          | Counterexample                                                                                                                                                                                                                                                                                                                                                                                                                                                              |
| Mode Calculation                            | 1          | Mode Calculation, Mode Identification                                                                                                                                                                                                                                                                                                                                                                                                                                       |
| Sorting Numbers                             | 1          | Sorting Numbers                                                                                                                                                                                                                                                                                                                                                                                                                                                             |
| Area of a Circle                            | 1          | Area of a Circle, Area of a Circle Calculation                                                                                                                                                                                                                                                                                                                                                                                                                              |
| Cross-Section of a Sphere                   | 1          | Cross-Section of a Sphere, Cross-sections of spheres                                                                                                                                                                                                                                                                                                                                                                                                                        |
| LCM Calculation                             | 1          | LCM Calculation                                                                                                                                                                                                                                                                                                                                                                                                                                                             |
| Proportion                                  | 1          | Proportion, Proportion Solving, Ratio and Proportion                                                                                                                                                                                                                                                                                                                                                                                                                        |
| Radius of a sphere                          | 1          | Radius of a sphere                                                                                                                                                                                                                                                                                                                                                                                                                                                          |
| Volume of a Tetrahedron                     | 1          | Volume of a Tetrahedron                                                                                                                                                                                                                                                                                                                                                                                                                                                     |
| Newton's Sums                               | 1          | Newton's Sums                                                                                                                                                                                                                                                                                                                                                                                                                                                               |
| Vieta's Formulas                            | 1          | Vieta's Formulas, Vieta's formulas                                                                                                                                                                                                                                                                                                                                                                                                                                          |

Table 4. **Summary of Cluster Tags (Sample Count  $\geq 3$ ).** Sample count represents the number of mathematical problems associated with each cluster tag. Keywords are derived from the tags within each cluster.

| Domain                                           | #questions | Keywords                                                                                                                                                                                                                                                                                     |
|--------------------------------------------------|------------|----------------------------------------------------------------------------------------------------------------------------------------------------------------------------------------------------------------------------------------------------------------------------------------------|
| Combinatorial Probability                        | 100        | Combinatorial Probability, Counting & Probability                                                                                                                                                                                                                                            |
| Basic Counting Principle                         | 46         | Basic Counting Principle, Counting Principle, Counting Principles, Fundamental Counting Principle, Fundamental Principle of Counting, Multiplication Principle of Counting                                                                                                                   |
| Combination Calculation                          | 36         | Combination Calculation, Combination Enumeration, Combination Formula, Combination Selection, Combination Subtraction, Combination and Permutation Calculation, Combinations, Combinations Calculation, Combinations Formula, Counting Combinations                                          |
| Factorial                                        | 31         | Factorial, Factorial Calculation, Factorial Division, Factorial Expansion, Factorial Manipulation, Factorial Multiplication, Factorial Properties, Factorial Simplification, Factorial simplification                                                                                        |
| Combinatorial Counting                           | 30         | Combinatorial Counting, Combinatorial Enumeration, Combinatorial Exclusion, Combinatorial Reasoning, Combinatorics, Counting, Counting Arrangements, Counting Multiples, Counting Subsets                                                                                                    |
| Binomial Coefficient                             | 29         | Binomial Coefficient, Binomial Coefficient Calculation, Binomial Coefficient Formula, Binomial Coefficient Multiplication, Binomial Coefficient Simplification, Binomial Coefficients, Binomial Coefficients Calculation, Binomial Expansion, Binomial Probability Formula, Binomial Theorem |
| Fraction Conversion                              | 28         | Fraction Conversion, Fraction Identification, Fraction Multiplication, Fraction Subtraction, Multiplication of Fractions, Percentage to Fraction Conversion, Simplifying Fractions                                                                                                           |
| Linear Equation Evaluation                       | 26         | Linear Equation Evaluation, Linear Equation Solving, Linear Expression Evaluation, Solving Linear Equations                                                                                                                                                                                  |
| Division Simplification                          | 24         | Division Simplification, Division of Fractions, Fraction Division, Fraction Multiplication and Simplification, Fraction Simplification, Ratio Simplification, Simplifying Ratios                                                                                                             |
| Addition                                         | 23         | Addition, Addition of Integers, Addition of integers, Arithmetic Addition, Integer Addition                                                                                                                                                                                                  |
| Arithmetic Operations                            | 21         | Arithmetic Operations, Basic Arithmetic Subtraction, Multiplication, Multiplication of Integers, Multiplication of integers                                                                                                                                                                  |
| Division Property of Equality                    | 21         | Division Property of Equality                                                                                                                                                                                                                                                                |
| Exponent Simplification                          | 21         | Exponent Simplification, Exponentiation                                                                                                                                                                                                                                                      |
| Basic Probability Calculation                    | 19         | Basic Probability Calculation, Conditional Probability Calculation, Probability, Probability Calculation                                                                                                                                                                                     |
| Equation Substitution                            | 18         | Equation Substitution, Substitution, Substitution Method, Variable Substitution                                                                                                                                                                                                              |
| Circular Permutations                            | 17         | Circular Permutations, Cyclic Permutations, Permutation, Permutations                                                                                                                                                                                                                        |
| Set Subtraction                                  | 13         | Set Subtraction, Subtraction                                                                                                                                                                                                                                                                 |
| Division                                         | 12         | Division, Division Algorithm, Long Division                                                                                                                                                                                                                                                  |
| GCD Calculation                                  | 12         | GCD Calculation                                                                                                                                                                                                                                                                              |
| Independent Probability Multiplication           | 11         | Independent Probability Multiplication, Multiplication Rule for Independent Events, Multiplication Rule for Probabilities, Probability Multiplication Rule                                                                                                                                   |
| Isolating Variables                              | 10         | Isolating Variables, Isolating the variable                                                                                                                                                                                                                                                  |
| Combinations with Repetition                     | 9          | Combinations with Repetition, Permutations and Combinations, Permutations with Repetition                                                                                                                                                                                                    |
| Counting Exclusion                               | 9          | Counting Exclusion, Exclusion Principle, Inclusion-Exclusion Principle                                                                                                                                                                                                                       |
| Counting and Summation                           | 8          | Counting and Summation, Summation                                                                                                                                                                                                                                                            |
| Adding Fractions                                 | 8          | Adding Fractions, Adding Fractions with Like Denominators, Adding Fractions with Unlike Denominators, Addition of Fractions, Arithmetic with Fractions, Common Denominator Addition, Fraction Addition, Multiplying Fractions                                                                |
| Prime Factorization                              | 8          | Prime Factorization                                                                                                                                                                                                                                                                          |
| Combining Like Terms                             | 7          | Combining Like Terms                                                                                                                                                                                                                                                                         |
| Place Value                                      | 7          | Place Value, Place Value Identification                                                                                                                                                                                                                                                      |
| Arithmetic Sequence                              | 6          | Arithmetic Sequence, Arithmetic Sequence Formula, Arithmetic Sequence Identification, Arithmetic Sequence Sum, Arithmetic Sequence Sum Formula, Arithmetic Sequence Summation, Arithmetic Sequences, Arithmetic Sequences Counting, Counting Terms in an Arithmetic Sequence                 |
| Equation Simplification                          | 6          | Equation Simplification, Linear Equation Simplification, Polynomial Simplification                                                                                                                                                                                                           |
| Conditional Probability                          | 6          | Conditional Probability                                                                                                                                                                                                                                                                      |
| Permutation with Restrictions                    | 6          | Permutation with Restrictions, Permutations with Restrictions, Permutations with restrictions                                                                                                                                                                                                |
| Divisibility Rule for 3                          | 6          | Divisibility Rule for 3, Divisibility Rules                                                                                                                                                                                                                                                  |
| Factoring by grouping                            | 6          | Factoring by grouping, Factorization                                                                                                                                                                                                                                                         |
| Complement Rule                                  | 5          | Complement Rule, Complement Rule in Probability                                                                                                                                                                                                                                              |
| Multiplication Principle                         | 4          | Multiplication Principle                                                                                                                                                                                                                                                                     |
| Arithmetic Series Formula                        | 4          | Arithmetic Series Formula, Arithmetic Series Sum Formula, Arithmetic Series Summation, Arithmetic Sum Calculation, Summation of Arithmetic Series                                                                                                                                            |
| Order of Operations                              | 4          | Order of Operations                                                                                                                                                                                                                                                                          |
| Equation Balancing                               | 3          | Equation Balancing                                                                                                                                                                                                                                                                           |
| Binomial Probability                             | 3          | Binomial Probability                                                                                                                                                                                                                                                                         |
| Counting Integers                                | 3          | Counting Integers, Counting Integers in a Range                                                                                                                                                                                                                                              |
| Power Set Calculation                            | 3          | Power Set Calculation                                                                                                                                                                                                                                                                        |
| Discriminant Calculation                         | 3          | Discriminant Calculation                                                                                                                                                                                                                                                                     |
| Identifying Coefficients in a Quadratic Equation | 3          | Identifying Coefficients in a Quadratic Equation, Quadratic Coefficients Identification                                                                                                                                                                                                      |
| Complementary Counting                           | 3          | Complementary Counting                                                                                                                                                                                                                                                                       |
| Distributive Property                            | 3          | Distributive Property                                                                                                                                                                                                                                                                        |
| Combination Symmetry                             | 3          | Combination Symmetry, Combinatorial Symmetry, Symmetry Counting                                                                                                                                                                                                                              |
| Area Calculation                                 | 3          | Area Calculation, Area Calculation of a Square, Area Ratios, Area of a Rectangle Calculation, Area of a Square Calculation, Area of a Triangle Calculation                                                                                                                                   |
| Area of a Right Triangle                         | 3          | Area of a Right Triangle, Area of a Triangle, Triangle Area Formula                                                                                                                                                                                                                          |
| Counting Outcomes                                | 3          | Counting Outcomes, Enumerating Outcomes                                                                                                                                                                                                                                                      |
| Independent Events                               | 3          | Independent Events, Independent Events Probability, Independent Events Probability Calculation, Probability of Independent Events                                                                                                                                                            |
| Scalar Multiplication                            | 3          | Scalar Multiplication                                                                                                                                                                                                                                                                        |
| Case Analysis                                    | 3          | Case Analysis                                                                                                                                                                                                                                                                                |
| Common Denominator Calculation                   | 3          | Common Denominator Calculation, Common Denominator Conversion, Finding a Common Denominator, Subtracting Fractions with Common Denominator, Subtracting Fractions with Common Denominators                                                                                                   |
| Finding the Least Common Multiple (LCM)          | 3          | Finding the Least Common Multiple (LCM), LCM Calculation, Least Common Multiple (LCM) Calculation                                                                                                                                                                                            |
| Factoring Common Factor                          | 3          | Factoring Common Factor, Factoring Out Common Factors, Finding Factors                                                                                                                                                                                                                       |
| Counting Even Numbers                            | 3          | Counting Even Numbers, Counting Odd Numbers, Even Numbers Identification, Even and Odd Numbers, Identifying Even Numbers                                                                                                                                                                     |
| Modular Arithmetic                               | 3          | Modular Arithmetic, Modulo Operation                                                                                                                                                                                                                                                         |

Table 5. **Summary of Cluster Tags (Sample Count < 3)**. Sample count represents the number of mathematical problems associated with each cluster tag. Keywords are derived from the tags within each cluster.

| Domain                                            | #questions | Keywords                                                                                                                                                                                                   |
|---------------------------------------------------|------------|------------------------------------------------------------------------------------------------------------------------------------------------------------------------------------------------------------|
| Probability Distribution                          | 2          | Probability Distribution                                                                                                                                                                                   |
| Range of Sums for Dice Rolls                      | 2          | Range of Sums for Dice Rolls, Sum of Two Dice Rolls                                                                                                                                                        |
| Uniform Probability Distribution                  | 2          | Uniform Probability Distribution                                                                                                                                                                           |
| Properties of Platonic Solids                     | 2          | Properties of Platonic Solids, Symmetry of Platonic Solids                                                                                                                                                 |
| Division of Constants                             | 2          | Division of Constants, Division of constants                                                                                                                                                               |
| Permutations of Multisets                         | 2          | Permutations of Multisets                                                                                                                                                                                  |
| Digit Fixation in Positional Notation             | 2          | Digit Fixation in Positional Notation, Digit Placement                                                                                                                                                     |
| Multiples Identification                          | 2          | Multiples Identification                                                                                                                                                                                   |
| Distance Formula                                  | 2          | Distance Formula, Horizontal Distance Calculation                                                                                                                                                          |
| Graphing Inequalities                             | 2          | Graphing Inequalities, Graphing Linear Inequalities, Linear Inequality Graphing                                                                                                                            |
| Intersection of Lines and Curves                  | 2          | Intersection of Lines and Curves, Line Intersection                                                                                                                                                        |
| Isosceles Right Triangle                          | 2          | Isosceles Right Triangle, Isosceles Triangle Properties                                                                                                                                                    |
| Probability of Combined Events                    | 2          | Probability of Combined Events, Probability of a Single Event                                                                                                                                              |
| Combinatorial Selection                           | 2          | Combinatorial Selection, Subset Selection                                                                                                                                                                  |
| Subset Identification                             | 2          | Subset Identification                                                                                                                                                                                      |
| Complementary Probability                         | 2          | Complementary Probability                                                                                                                                                                                  |
| Probability Addition Rule                         | 2          | Probability Addition Rule, Total Probability Rule                                                                                                                                                          |
| Factor Pairing                                    | 2          | Factor Pairing, Factor Pairs Identification                                                                                                                                                                |
| Finding Multiples                                 | 2          | Finding Multiples, Multiples of a Number                                                                                                                                                                   |
| Prime Identification                              | 2          | Prime Identification, Prime Number Identification, Prime and Composite Numbers Identification                                                                                                              |
| Expected Value Calculation                        | 2          | Expected Value Calculation                                                                                                                                                                                 |
| Addition and Subtraction Properties of Equality   | 2          | Addition and Subtraction Properties of Equality                                                                                                                                                            |
| Long Multiplication                               | 2          | Long Multiplication, Multiplication of Large Numbers                                                                                                                                                       |
| Geometric Series                                  | 2          | Geometric Series, Geometric Series Formula, Geometric Series Identification, Geometric Series Sum Formula, Geometric Series Summation, Infinite Geometric Series Formula, Sum of Infinite Geometric Series |
| Pascal's Triangle Construction                    | 2          | Pascal's Triangle Construction, Pascal's Triangle Row Sum                                                                                                                                                  |
| Independent Probability                           | 2          | Independent Probability                                                                                                                                                                                    |
| Exponentiation of Fractions                       | 2          | Exponentiation of Fractions                                                                                                                                                                                |
| Simplifying Rational Expressions                  | 2          | Simplifying Rational Expressions                                                                                                                                                                           |
| Pascal's Identity                                 | 2          | Pascal's Identity, Pascal's Triangle                                                                                                                                                                       |
| Summation of Series                               | 2          | Summation of Series, Summation of a Sequence                                                                                                                                                               |
| Intersection of Sets                              | 2          | Intersection of Sets, Set Intersection                                                                                                                                                                     |
| Set Union                                         | 2          | Set Union, Set Union Cardinality                                                                                                                                                                           |
| Percentage Calculation                            | 2          | Percentage Calculation, Percentage Conversion, Percentage to Decimal Conversion                                                                                                                            |
| Symmetry in Probability                           | 2          | Symmetry in Probability                                                                                                                                                                                    |
| Counting Grid Positions                           | 2          | Counting Grid Positions, Counting Rectangles in a Grid, Counting Squares in a Grid, Counting Subsets in a Grid                                                                                             |
| Parity                                            | 2          | Parity                                                                                                                                                                                                     |
| Recurrence Relation                               | 2          | Recurrence Relation, Recurrence Relations                                                                                                                                                                  |
| Block Permutation                                 | 2          | Block Permutation                                                                                                                                                                                          |
| Digit Pairing for Sum                             | 2          | Digit Pairing for Sum, Digit Sum Calculation, Pairing Numbers for a Fixed Sum                                                                                                                              |
| Permutation Calculation                           | 2          | Permutation Calculation                                                                                                                                                                                    |
| Cyclic Number Patterns                            | 2          | Cyclic Number Patterns, Cyclic Sequences                                                                                                                                                                   |
| Bipartite Graph                                   | 2          | Bipartite Graph, Bipartite Graph Coloring                                                                                                                                                                  |
| Digit Constraints                                 | 2          | Digit Constraints, Digit Restriction, Digit Sum Constraints, Single-digit constraint                                                                                                                       |
| Counting Leap Years                               | 1          | Counting Leap Years, Leap Year Calculation                                                                                                                                                                 |
| Minimum Value Calculation                         | 1          | Minimum Value Calculation                                                                                                                                                                                  |
| Pigeonhole Principle                              | 1          | Pigeonhole Principle                                                                                                                                                                                       |
| Range Calculation                                 | 1          | Range Calculation                                                                                                                                                                                          |
| Burnside's Lemma                                  | 1          | Burnside's Lemma                                                                                                                                                                                           |
| Polyhedron Properties                             | 1          | Polyhedron Properties, Properties of Polyhedra                                                                                                                                                             |
| Rotational Symmetry                               | 1          | Rotational Symmetry                                                                                                                                                                                        |
| Rotational Symmetry of Polyhedra                  | 1          | Rotational Symmetry of Polyhedra, Symmetry in Polyhedra                                                                                                                                                    |
| Slope Calculation                                 | 1          | Slope Calculation                                                                                                                                                                                          |
| Pair Counting                                     | 1          | Pair Counting                                                                                                                                                                                              |
| Pairwise Sum Calculation                          | 1          | Pairwise Sum Calculation                                                                                                                                                                                   |
| Division of Even Numbers                          | 1          | Division of Even Numbers                                                                                                                                                                                   |
| Frequency Distribution                            | 1          | Frequency Distribution                                                                                                                                                                                     |
| Conditional Statements                            | 1          | Conditional Statements                                                                                                                                                                                     |
| Counting Intervals                                | 1          | Counting Intervals                                                                                                                                                                                         |
| Period Calculation                                | 1          | Period Calculation                                                                                                                                                                                         |
| Time Interval Calculation                         | 1          | Time Interval Calculation                                                                                                                                                                                  |
| Unit Conversion                                   | 1          | Unit Conversion                                                                                                                                                                                            |
| Factoring Quadratic Expressions                   | 1          | Factoring Quadratic Expressions                                                                                                                                                                            |
| Simultaneous Equations                            | 1          | Simultaneous Equations                                                                                                                                                                                     |
| Counting Cyclic Quadrilaterals with Integer Sides | 1          | Counting Cyclic Quadrilaterals with Integer Sides                                                                                                                                                          |
| Counting Rectangles                               | 1          | Counting Rectangles                                                                                                                                                                                        |
| Hockey Stick Identity                             | 1          | Hockey Stick Identity                                                                                                                                                                                      |
| Perimeter Calculation                             | 1          | Perimeter Calculation                                                                                                                                                                                      |
| Properties of Quadrilaterals                      | 1          | Properties of Quadrilaterals, Symmetry in Quadrilaterals                                                                                                                                                   |
| Properties of a Square                            | 1          | Properties of a Square                                                                                                                                                                                     |
| Stars and Bars Method                             | 1          | Stars and Bars Method                                                                                                                                                                                      |
| Triangle Inequality                               | 1          | Triangle Inequality                                                                                                                                                                                        |
| Distance Comparison                               | 1          | Distance Comparison                                                                                                                                                                                        |
| Absolute Value Simplification                     | 1          | Absolute Value Simplification                                                                                                                                                                              |
| Subset Definition                                 | 1          | Subset Definition                                                                                                                                                                                          |
| Equivalent Fractions                              | 1          | Equivalent Fractions                                                                                                                                                                                       |
| Cube Root Estimation                              | 1          | Cube Root Estimation                                                                                                                                                                                       |
| Inequality Comparison                             | 1          | Inequality Comparison                                                                                                                                                                                      |
| Sequential Multiplication                         | 1          | Sequential Multiplication                                                                                                                                                                                  |
| Angle Measurement in Radians                      | 1          | Angle Measurement in Radians, Radian-Degree Conversion                                                                                                                                                     |
| Arc Length Calculation                            | 1          | Arc Length Calculation, Arc Length Formula                                                                                                                                                                 |
| Arc Measure                                       | 1          | Arc Measure                                                                                                                                                                                                |
| Central Angle Theorem                             | 1          | Central Angle Theorem                                                                                                                                                                                      |
| Circumference of a Circle                         | 1          | Circumference of a Circle                                                                                                                                                                                  |
| Commutative Property of Addition                  | 1          | Commutative Property of Addition                                                                                                                                                                           |
| Factorial Decomposition                           | 1          | Factorial Decomposition                                                                                                                                                                                    |
| Matrix Indexing                                   | 1          | Matrix Indexing                                                                                                                                                                                            |
| Probability with Replacement                      | 1          | Probability with Replacement                                                                                                                                                                               |

## 5 Examples of Decomposed Data

We apply our data decomposition method to the S1 dataset and demonstrate the two-layer recursive decomposition process for a sample data point in Table 6.

Table 6. **Decomposed S1 data sample.** Black text denotes the original data; yellow text represents the first level of decomposition; and blue text represents the second level of decomposition.

---

{ Question: "Given a rational number, write it as a fraction in lowest terms and calculate the product of the resulting numerator and denominator. For how many rational numbers between 0 and 1 will  $20!$  be the resulting product?",

Solution: "Let the rational number between 0 and 1 be  $r$ . When written as a fraction in lowest terms, let it be  $\frac{a}{b}$ , where  $a$  and  $b$  are positive integers,  $\gcd(a, b) = 1$ , and  $0 < a < b$ . We are given that the product of the numerator and denominator is  $20!$ , so  $a \times b = 20!$ . We need to find the number of pairs  $(a, b)$  such that  $a \times b = 20!$ ,  $\gcd(a, b) = 1$ , and  $a < b$ . Let  $N = 20!$ . The prime factorization of  $N$  is  $p_1^{e_1} p_2^{e_2} \cdots p_k^{e_k}$ , where  $p_i$  are distinct prime numbers. The number of distinct prime factors of  $20!$  is the number of primes less than or equal to 20. These primes are 2, 3, 5, 7, 11, 13, 17, 19. Thus, there are 8 distinct prime factors, so  $k = 8$ . Since  $a \times b = N$  and  $\gcd(a, b) = 1$ , each prime power factor  $p_i^{e_i}$  of  $N$  must be entirely a factor of  $a$  or entirely a factor of  $b$ . The number of ways to distribute the prime power factors between  $a$  and  $b$  is  $2^k$ , where  $k$  is the number of distinct prime factors of  $N$ . Each distribution corresponds to a unique pair  $(a, b)$  such that  $a \times b = N$  and  $\gcd(a, b) = 1$ . The number of such pairs is  $2^{\omega(N)}$ , where  $\omega(N)$  is the number of distinct prime factors of  $N$ . Since  $20!$  is not a perfect square, for every pair  $(a, b)$  such that  $a \times b = 20!$  and  $\gcd(a, b) = 1$ , we have  $a \neq b$ . The pairs can be grouped into  $(a, b)$  and  $(b, a)$ , where  $a \neq b$ . The number of pairs with  $a < b$  is equal to the number of pairs with  $b < a$ . The total number of pairs is  $2^{\omega(20!)}$ . The number of pairs with  $a < b$  is  $\frac{1}{2} \times 2^{\omega(20!)} = 2^{\omega(20!)-1}$ . The number of distinct prime factors of  $20!$  is  $\omega(20!) = 8$ . The number of pairs  $(a, b)$  such that  $a \times b = 20!$ ,  $\gcd(a, b) = 1$ , and  $a < b$  is  $2^{8-1} = 2^7 = 128$ . Each such pair  $(a, b)$  corresponds to a unique rational number  $\frac{a}{b}$  between 0 and 1 in lowest terms, with the product of the numerator and denominator equal to  $20!$ . Final Answer: The final answer is 128 }

Solution:

{ ReasoningStep: "Let the rational number between 0 and 1 be  $r = \frac{a}{b}$  in lowest terms with  $\gcd(a, b) = 1$ ,  $0 < a < b$ , and  $a \times b = 20!$ ".

Tag: "Reducing a fraction to lowest terms",

Question: "In the context of finding rational numbers  $r = \frac{a}{b}$  in lowest terms with  $a \cdot b = 20!$ , suppose you start with the unreduced fraction  $\frac{7}{20!/7}$ . Reduce this fraction to lowest terms.",

Solution: {

ReasoningStep: "We have the fraction  $F = \frac{7}{20!/7}$ . Since  $20!$  contains  $7^2$  (because  $\lfloor 20/7 \rfloor = 2$ ), the number  $20!/7$  is still divisible by 7.",

Tag: "Exponent of a prime in a factorial (Legendre's formula)",

Question: "In the context of reducing the fraction  $7/(20!/7)$ , use Legendre's formula to find the exponent of the prime 7 in the prime factorization of  $20!$ .",

Solution: " 1. Legendre's formula states that the exponent of a prime  $p$  in  $n!$  is given by the sum of  $\lfloor n/p^k \rfloor$  for  $k = 1, 2, \dots, p^k > n$ .

2. Here,  $n=20$  and  $p=7$ :

- For  $k=1$ :  $\lfloor 20/7 \rfloor = 2$
- For  $k=2$ :  $\lfloor 20/49 \rfloor = 0$
- Higher powers of 7 exceed 20, so their terms are zero.

3. Summing these gives  $2 + 0 = 2$ ."

},

---

---

```

{
ReasoningStep:"Compute gcd(7, 20!/7). Because 20! contains 72, dividing by 7 leaves one factor of 7, so gcd(7, 20!/7) = 7.",
Tag:"GCD calculation using prime factorization",
Question:"In reducing the fraction 7 one over (20! divided by 7) to lowest terms, compute gcd(7, 20!/7) by using prime factorization.",
Solution:"1. We need the exponent of the prime 7 in 20!.
2. Use the formula for exponent of a prime p in n!: v7(20!) = ⌊20/7⌋ + ⌊20/49⌋ = 2 + 0 = 2.
3. Thus 20! has a factor 72.
4. When we divide 20! by 7, the exponent of 7 in (20!/7) is 2 - 1 = 1.
5. So (20!/7) contains exactly one factor of 7, and the number 7 also contains one factor of 7.
6. Therefore gcd(7, 20!/7) = 71 = 7."
}
{
ReasoningStep:"Divide numerator and denominator by 7: Numerator: 7 ÷ 7 = 1. Denominator: (20!/7) ÷ 7 = 20!/(72) = 20!/49.",
Tag:"Cancelling common factors in a fraction",
Question:"In the context of the original problem, you encounter the fraction  $\frac{7}{20!/7}$ . By cancelling the common factor 7 in the numerator and denominator, what is the resulting simplified denominator?",
Solution:"1. Start with the fraction  $\frac{7}{20!/7}$ . 2. Observe that both the numerator and denominator contain the factor 7. 3. Divide numerator and denominator by 7: - New numerator: 7 ÷ 7 = 1. - New denominator: (20!/7) ÷ 7 = 20!/(72) = 20!/49. 4. Thus, after cancellation, the fraction becomes  $\frac{1}{20!/49}$ . 5. The question asks for the simplified denominator, which is 20!/49."
},
{
ReasoningStep:"Hence the fraction in lowest terms is  $\frac{1}{20!/49}$ .",
Tag:"Reducing fractions to lowest terms",
Question:"Reduce the fraction 7 divided by (20! divided by 7) to lowest terms.",
Solution:"1. Start with the unreduced fraction: 7 / (20! / 7).
2. Rewrite as a single fraction: 7 × 7 / 20! = 49 / 20!.
3. Observe that 20! contains the factor 72 = 49, so gcd(49, 20!) = 49.
4. Divide numerator and denominator by 49: • Numerator: 49 ÷ 49 = 1 • Denominator: 20! ÷ 49. Hence the fraction in lowest terms is 1 / (20! / 49).
6. Compute 20! = 2 432 902 008 176 640 000, then divide by 49 to get 49 651 061 391 360 000.
7. Final reduced form is 1 / 49651061391360000.",
},

```

---



---

```

{
ReasoningStep:"Set  $N = 20!$ . Its prime factorization has  $k = 8$  distinct primes (2, 3, 5, 7, 11, 13, 17, 19).",
Tag:"Prime Factorization",
Question:"How many distinct prime numbers appear in the prime factorization of  $20!$ ?",
Solution:
{ ReasoningStep:"By definition,  $20! = 1 \times 2 \times 3 \times \dots \times 20$ , so every prime  $p \leq 20$  divides  $20!$ .",
Tag:"Definition of factorial",
Question:"In the definition of factorial,  $20!$  is written as the product  $1 \times 2 \times 3 \times \dots \times 20$ . How many integers are multiplied together in this product?",
Solution:"By definition,  $n! = 1 \times 2 \times 3 \times \dots \times n$ , which multiplies all integers from 1 up to  $n$ . For  $n = 20$ , the integers are 1, 2, 3, ..., 20. Counting these gives 20 numbers being multiplied.",
{ ReasoningStep:"The primes less than or equal to 20 are 2, 3, 5, 7, 11, 13, 17, and 19, and there are no others in that range.",
Tag:"Primality Testing",
Question:"Among the integers from 1 through 20 inclusive, how many are prime numbers?",
Solution:"1. By definition, a prime number is an integer greater than 1 that has no positive divisors other than 1 and itself.

2. We test each integer from 1 to 20: - 1 is not prime by definition. - 2 is divisible only by 1 and 2  $\rightarrow$  prime. - 3 is divisible only by 1 and 3  $\rightarrow$  prime. - 4 is divisible by 1, 2, 4  $\rightarrow$  not prime. - 5 is divisible only by 1 and 5  $\rightarrow$  prime. - 6 is divisible by 1, 2, 3, 6  $\rightarrow$  not prime. - 7 is divisible only by 1 and 7  $\rightarrow$  prime. - 8 is divisible by 1, 2, 4, 8  $\rightarrow$  not prime. - 9 is divisible by 1, 3, 9  $\rightarrow$  not prime. - 10 is divisible by 1, 2, 5, 10  $\rightarrow$  not prime. - 11 is divisible only by 1 and 11  $\rightarrow$  prime. - 12 is divisible by 1, 2, 3, 4, 6, 12  $\rightarrow$  not prime. - 13 is divisible only by 1 and 13  $\rightarrow$  prime. - 14 is divisible by 1, 2, 7, 14  $\rightarrow$  not prime. - 15 is divisible by 1, 3, 5, 15  $\rightarrow$  not prime. - 16 is divisible by 1, 2, 4, 8, 16  $\rightarrow$  not prime. - 17 is divisible only by 1 and 17  $\rightarrow$  prime. - 18 is divisible by 1, 2, 3, 6, 9, 18  $\rightarrow$  not prime. - 19 is divisible only by 1 and 19  $\rightarrow$  prime. - 20 is divisible by 1, 2, 4, 5, 10, 20  $\rightarrow$  not prime.

3. The primes in this range are 2, 3, 5, 7, 11, 13, 17, and 19.

4. Counting them gives a total of 8 primes.",
{ ReasoningStep:"Therefore, the prime factorization of  $20!$  includes exactly these 8 distinct primes.",
Tag:"Prime Factorization",
Question:"When prime factorizing  $20!$ , we include every prime number that is less than or equal to 20. How many distinct prime numbers appear in the prime factorization of  $20!$  ?",
Solution:"1. A prime divides  $20!$  exactly if it is  $\leq 20$ , since  $20!$  is the product of all integers from 1 to 20.

2. The primes  $\leq 20$  are 2, 3, 5, 7, 11, 13, 17, and 19.

3. Counting these gives 8 distinct primes in the factorization of  $20!$ ." },

```

---

---

{ ReasoningStep:"Since  $\gcd(a, b) = 1$ , each prime power  $p_i^{e_i}$  of  $N$  must go entirely to  $a$  or  $b$ , giving  $2^k$  pairs  $(a, b)$ ."},

Tag:"Fundamental Theorem of Arithmetic",

Question:"Let  $N$  be  $20!$  and write  $N$  in its prime factorization  $N = p_1^{e_1} \cdot p_2^{e_2} \cdot \dots \cdot p_k^{e_k}$ .

Using the Fundamental Theorem of Arithmetic, in how many ways can you choose a pair of positive integers  $(a, b)$  such that  $ab = N$  and  $\gcd(a, b) = 1$  by assigning each prime power  $p_i^{e_i}$  entirely to either  $a$  or  $b$ ?",

Solution:{ ReasoningStep:"By the Fundamental Theorem of Arithmetic,  $20!$  factors into prime powers corresponding to each prime  $p \leq 20$ ."},

Tag:"Prime Factorization",

Question:"In the prime factorization of  $20!$ , what is the exponent of the prime  $2$ ?",

Solution:"1. By Legendre's formula, the exponent of a prime  $p$  in  $n!$  is  $\lfloor n/p \rfloor + \lfloor n/p^2 \rfloor + \lfloor n/p^3 \rfloor + \dots$  until the terms are zero.

2. For  $p = 2$  and  $n = 20$ :  $\lfloor 20/2 \rfloor = 10$ ,  $\lfloor 20/4 \rfloor = 5$ ,  $\lfloor 20/8 \rfloor = 2$ ,  $\lfloor 20/16 \rfloor = 1$ ,  $\lfloor 20/32 \rfloor = 0$  (and all higher powers give zero)

3. Sum these:  $10 + 5 + 2 + 1 = 18$ .",

},

{ ReasoningStep:"The primes  $\leq 20$  are 2, 3, 5, 7, 11, 13, 17, 19, so there are  $k = 8$  distinct prime powers in the factorization of  $20!$ ."},

Tag:"Listing primes up to a given limit",

Question:"In the prime factorization of  $20!$ , how many distinct prime bases (i.e., prime numbers  $\leq 20$ ) appear?",

Solution:"

1. To find the distinct prime factors of  $20!$ , we list all prime numbers that are less than or equal to 20.

2. A prime number is a number greater than 1 with no positive divisors other than 1 and itself.

3. Checking the integers from 2 up to 20, the primes are: 2, 3, 5, 7, 11, 13, 17, 19. Count these primes: there are 8 of them.",

},

---

---

{ReasoningStep:"To form a pair (a, b) with  $ab = N$  and  $\gcd(a, b) = 1$ , each prime power  $p_i^{e_i}$  must go entirely to a or entirely to b.",

Tag:"Fundamental Theorem of Arithmetic",

Question:"Let  $N = 20!$  and write its prime factorization as  $N = p_1^{e_1} \cdot p_2^{e_2} \cdot \dots \cdot p_k^{e_k}$ . By the Fundamental Theorem of Arithmetic, to form pairs of positive integers (a, b) with  $ab = N$  and  $\gcd(a, b) = 1$ , each prime power  $p_i^{e_i}$  must go entirely to a or entirely to b. For a single prime power  $p_i^{e_i}$ , in how many ways can you assign it to either a or b so that  $\gcd(a, b) = 1$ ?",

Solution:" 1. The Fundamental Theorem of Arithmetic ensures  $N$ 's prime factorization is unique.

2. To keep  $\gcd(a, b) = 1$ , you cannot split  $p_i^{e_i}$  between a and b.

3. Therefore, for that prime power, you have exactly two choices: - Assign  $p_i^{e_i}$  to a (so exponent in a is  $e_i$ , in b is 0), - or assign  $p_i^{e_i}$  to b (so exponent in a is 0, in b is  $e_i$ ).

4. No other distributions are allowed without violating  $\gcd(a, b) = 1$ .",

},

{ReasoningStep:"Each of the  $k = 8$  prime powers has 2 choices, so by the multiplication principle there are  $2^k = 2^8$  ways.",

Tag:"Fundamental Counting Principle",

Question:"Suppose the prime factorization of  $20!$  contains 8 distinct prime powers. If you assign each prime power entirely to either integer a or integer b, in how many ways can you make these assignments by the Fundamental Counting Principle?",

Solution:"1. There are 8 prime powers to assign.

2. Each prime power has 2 independent choices: assign it to a or to b.

3. By the Fundamental Counting Principle, multiply the number of choices for each prime power: Total ways =  $2 \cdot 2 \cdot \dots \cdot 2$  (8 times) =  $2^8 = 256$ .",

}},

},

{ReasoningStep:"As  $20!$  is not a perfect square,  $a \neq b$ , so half the pairs have  $a < b$ , yielding  $2^{k-1} = 2^7 = 128$ .",

Tag:"Divisor Pairing Principle",

Question:"Using the Divisor Pairing Principle, in how many ways can we write  $20!$  as a product ab of two positive integers with  $\gcd(a, b) = 1$  and  $a < b$ ?",

---

---

Solution:

{ReasoningStep:"The prime factorization of  $20!$  involves exactly  $k = 8$  distinct primes (2, 3, 5, 7, 11, 13, 17, 19).",

Tag:"Prime factorization",

Question:"In the prime factorization of  $20!$ , how many distinct prime factors does it contain?",

Solution:"1. By definition,  $20! = 1 \cdot 2 \cdot 3 \cdot \dots \cdot 20$ .

2. Every prime  $p \leq 20$  divides one of the factors in the product.

3. The prime numbers less than or equal to 20 are 2, 3, 5, 7, 11, 13, 17, and 19.

4. There are 8 such primes.",

},

{ReasoningStep:"To have  $ab = 20!$  and  $\gcd(a, b) = 1$ , each prime's entire power in  $20!$  must go either to  $a$  or to  $b$ .",

Tag:"Unique Prime Factorization",

Question:"In the prime factorization of  $20!$ , what is the exponent of the prime 3?",

Solution:"1. By unique prime factorization, the exponent of a prime  $p$  in  $n!$  is given by summing  $\lfloor n/p^k \rfloor$  for  $k \geq 1$  until  $p^k > n$ .

2. For  $p=3$  and  $n=20$ :  $-\lfloor 20/3 \rfloor = 6$ ,  $\lfloor 20/9 \rfloor = 2$ ,  $\lfloor 20/27 \rfloor = 0$  (stop here)

3. Sum of these is  $6 + 2 = 8$ .",

},

{ReasoningStep:"Therefore there are  $2^k = 2^8 = 256$  unordered assignments of prime-powers to  $(a, b)$ .",

Tag:"Fundamental Counting Principle",

Question:"The prime factorization of  $20!$  involves 8 distinct prime-power factors. Suppose each entire prime-power factor must be assigned either to integer  $a$  or to integer  $b$ . Using the Fundamental Counting Principle, in how many ways can these 8 prime powers be distributed between  $a$  and  $b$ ?",

Solution:"1. There are 8 distinct prime-power factors in  $20!$  (for primes 2, 3, 5, 7, 11, 13, 17, 19).

2. For each prime-power factor, we have exactly 2 choices: assign it to  $a$  or assign it to  $b$ .

3. By the Fundamental Counting Principle, the total number of ways to make all choices is  $2 \times 2 \times \dots \times 2$  (8 factors)  $= 2^8$ .

4. Compute  $2^8 = 256$ .",

},

{ReasoningStep:"Since  $20!$  is not a perfect square, no assignment yields  $a = b$ , so exactly half of these yield  $a < b$ , giving  $256/2 = 128$ .",

Tag:"Symmetry argument in combinatorial counting",

Question:"Suppose there are 256 ordered pairs of positive integers  $(a, b)$  such that  $ab = 20!$  and  $\gcd(a, b) = 1$ . Using a symmetry argument, how many of these pairs satisfy  $a < b$ ?",

Solution:"1. We are given that there are 256 ordered coprime factor pairs  $(a, b)$  with  $ab = 20!$ .

2. For each ordered pair  $(a, b)$ , there is a corresponding "swapped" pair  $(b, a)$ .

3. Because  $20!$  is not a perfect square, no pair has  $a = b$ ; every pair is distinct from its swap.

4. Thus the 256 ordered pairs split evenly into two groups: those with  $a < b$  and those with  $a > b$ .

5. By symmetry, the number with  $a < b$  is half of 256, namely  $256/2 = 128$ .", }, }

---
